# Supplementary material for: Shielding against breast tumor relapse with an autologous chemo-photo-immune active Nano–Micro-Sera based fibrin implant
Source: Royal Society of Chemistry journal article supplement (doi:10.1039/d4nr01076k), 2024-01-01
Supplement: d4nr01076k2.pdf [file d4nr01076k2.pdf]

Supplementary Information

**Shielding against Breast Tumor Relapse with an Autologous Chemo-Photo-Immune  
active Nano-Micro-Sera based Fibrin Implant**

Mimansa<sup>1</sup>, Mohammad Adeel Zafar<sup>2</sup>, Dinesh Kumar Verma<sup>3</sup>, Reena Das<sup>4</sup>, Javed Naim  
Agrewala<sup>2\*</sup>, Asifkhan Shanavas<sup>1\*</sup>

<sup>1</sup>Inorganic & Organic Nanomedicine (ION) Lab, Chemical Biology Unit, Institute of Nano  
Science and Technology, Sector-81, Knowledge City, Sahibzada Ajit Singh Nagar, Punjab  
140306, India.

<sup>2</sup>Department of Biomedical Engineering, Indian Institute of Technology Ropar, Rupnagar,  
Punjab 140001, India

<sup>3</sup>All India Institute of Medical Sciences Bilaspur, Changar Palasiyan, Noa, Himachal Pradesh,  
India, 174001

<sup>4</sup>Department of Haematology, Post Graduate Institute of Medical Education and Research  
(PGIMER), Chandigarh 160012, India

\*Corresponding author: [asifkhan@inst.ac.in](mailto:asifkhan@inst.ac.in)

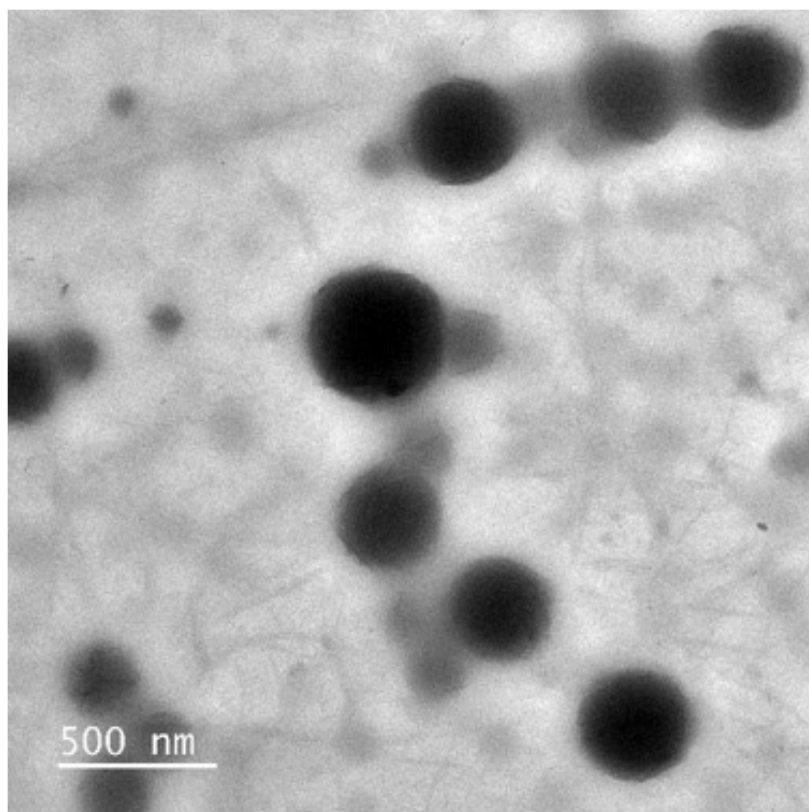

**Figure S1.** Low magnification TEM image of Lap-NS

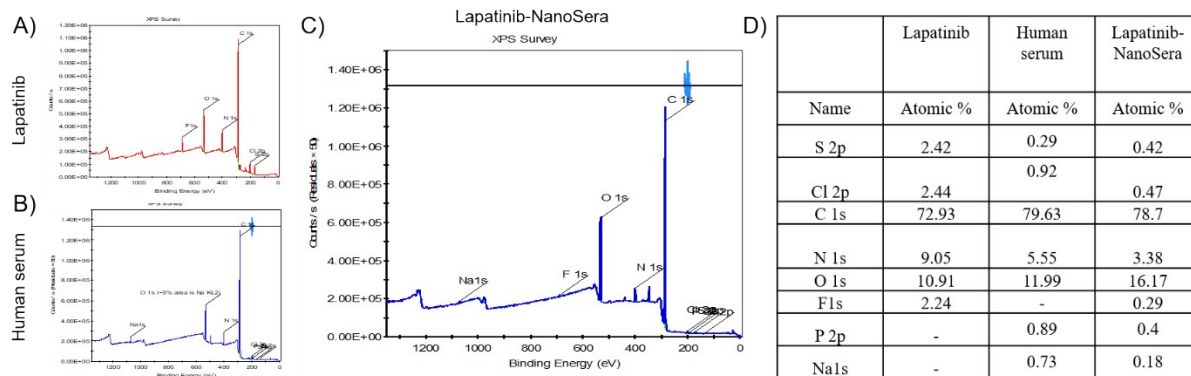

**Figure S2:** XPS survey of A) Lapatinib, B) human serum, C) Lapatinib-NanoSera and D) Table for atomic % of different elements.

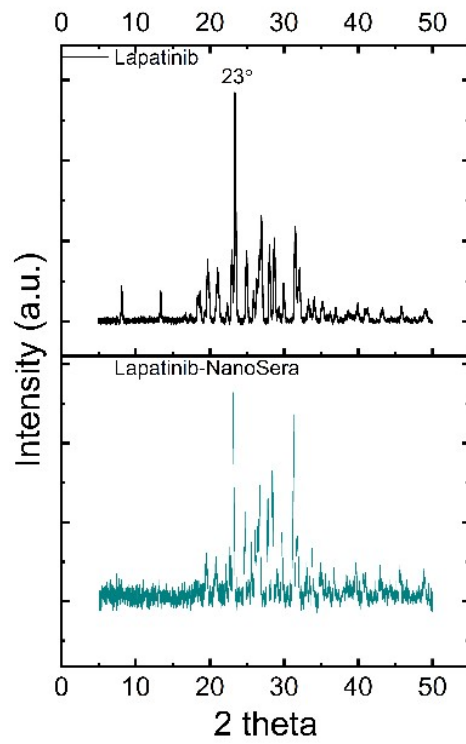

**Figure S3:** X-Ray diffraction pattern of Lapatinib and Lapatinib-NanoSera.

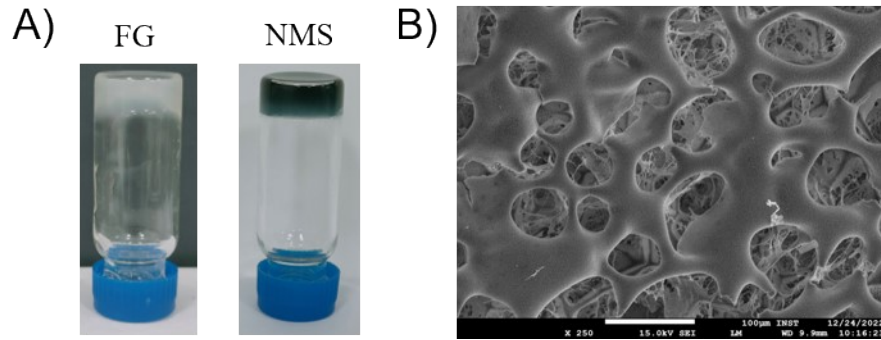

**Figure S4:** a) Fibrin glue (FG) without and with NMS embedded b) FESEM of FG.

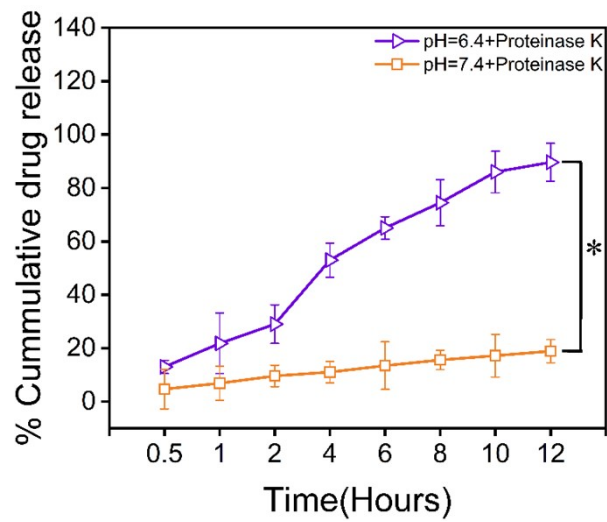

**Figure S5:** Percentage cumulative drug release of Imiquimod-Microspheres (IMQ-MS) at pH=6.4 and pH=7.4 in the presence of proteinase K.

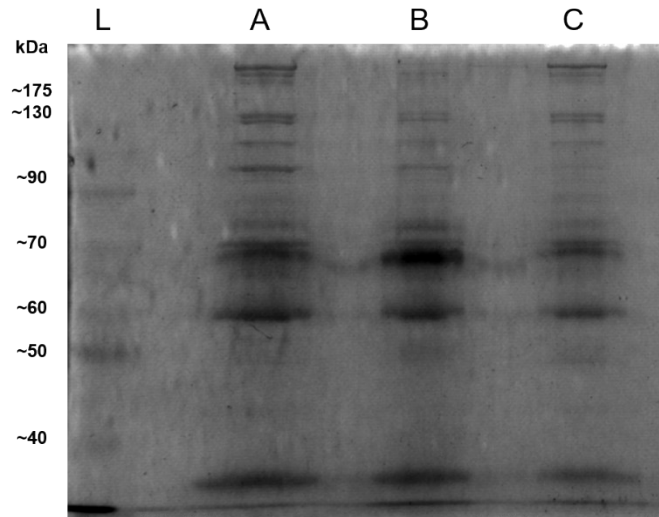

**Figure S6:** SDS-PAGE analysis of serum retrieved from Lap-NS synthesized from donor A, B and C (L-ladder)

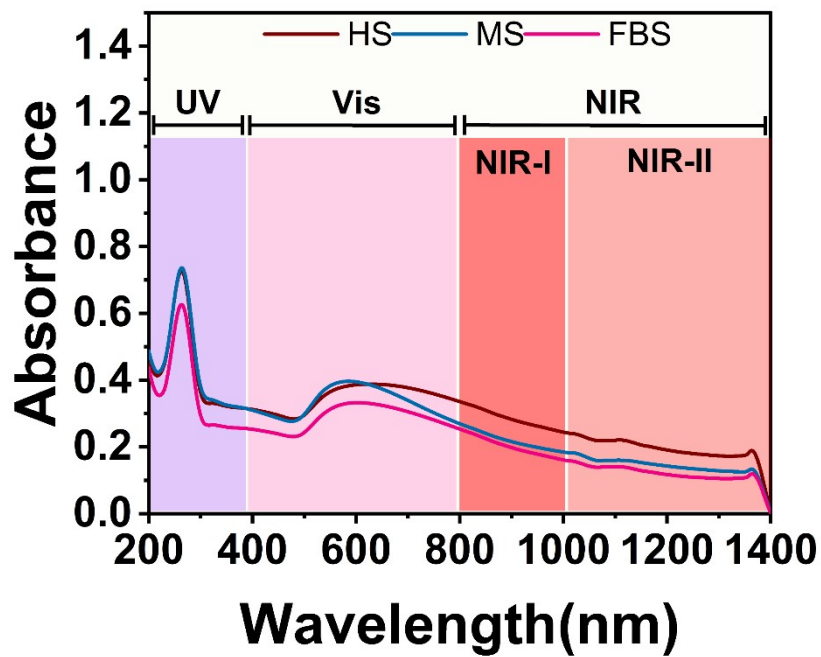

**Figure S7:** UV-Vis-NIR extinction spectra of PNS synthesized with different serum sources (HS-Human serum, MS-Mouse serum and FBS-Fetal bovine serum).

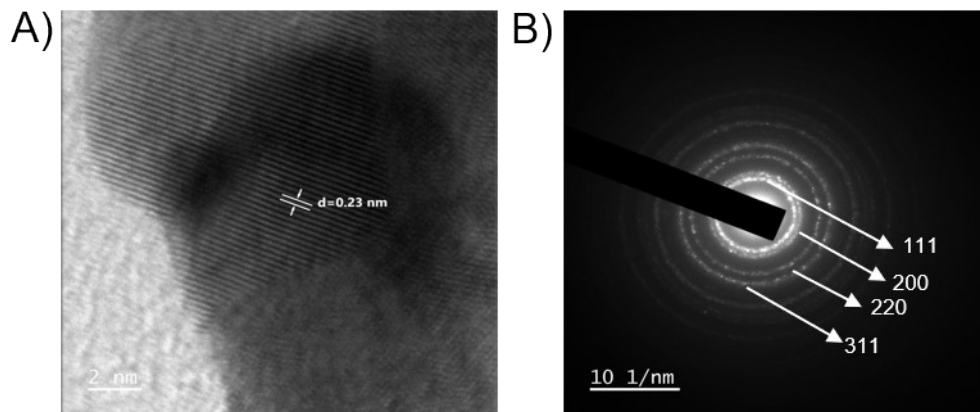

**Figure S8:** A) HRTEM image of PNS showing 0.23 nm fringe spacing B) SAED pattern of PNS.

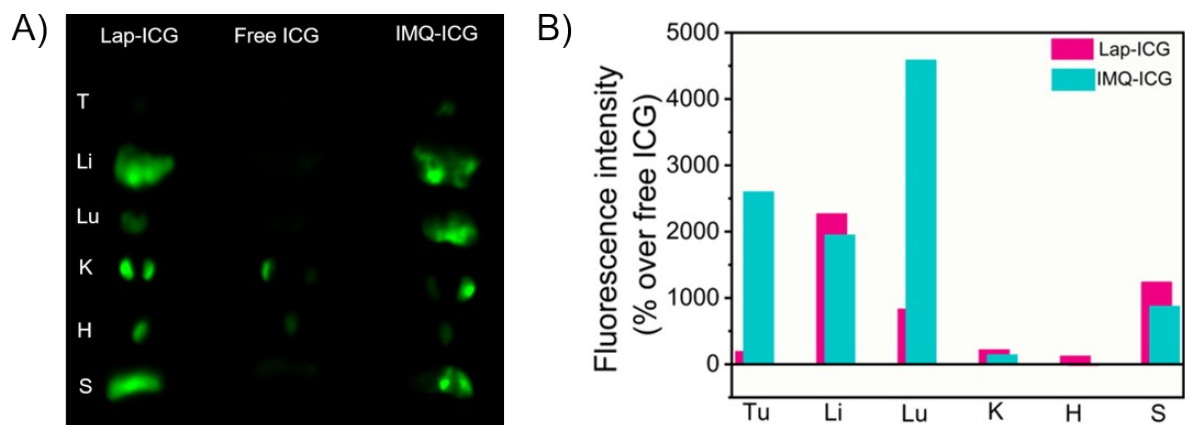

**Figure S9:** A) Ex vivo fluorescence imaging of major organs from Lapatinib-NanoSera tagged with ICG (Lap-ICG), Free ICG and Imiquimod-MicroSera tagged with ICG (IMQ-ICG). T, Li, Lu, K, H and S stands for Tumor, Liver, Lung, Kidney, Heart and Spleen respectively B) Fluorescence intensity of Free-ICG, Lap-ICG and IMQ-ICG calculated from imagej.

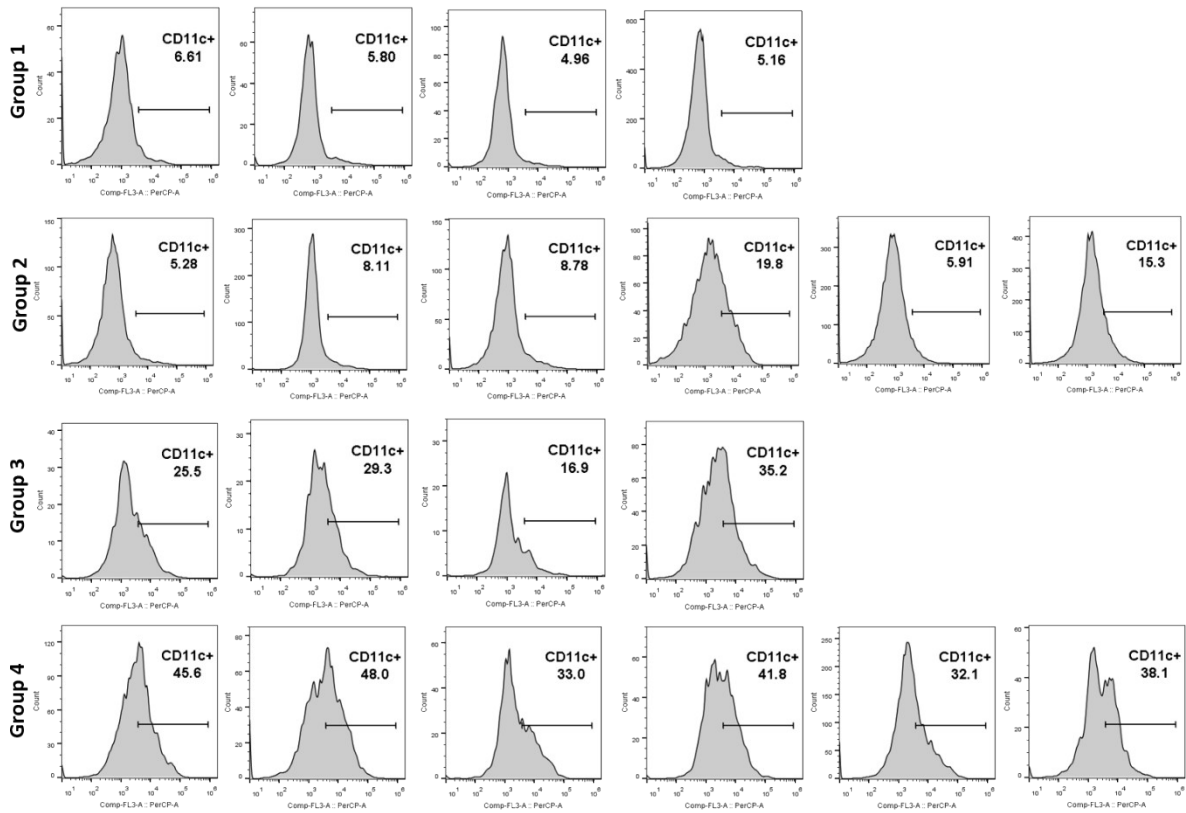

**Figure S10:** Representative flow cytometry plots of CD11c<sup>+</sup> in Group1-FG, Group 2-Lap+PNSL-FG, Group 3-IMQ-MS-FG and Group 4-NMS



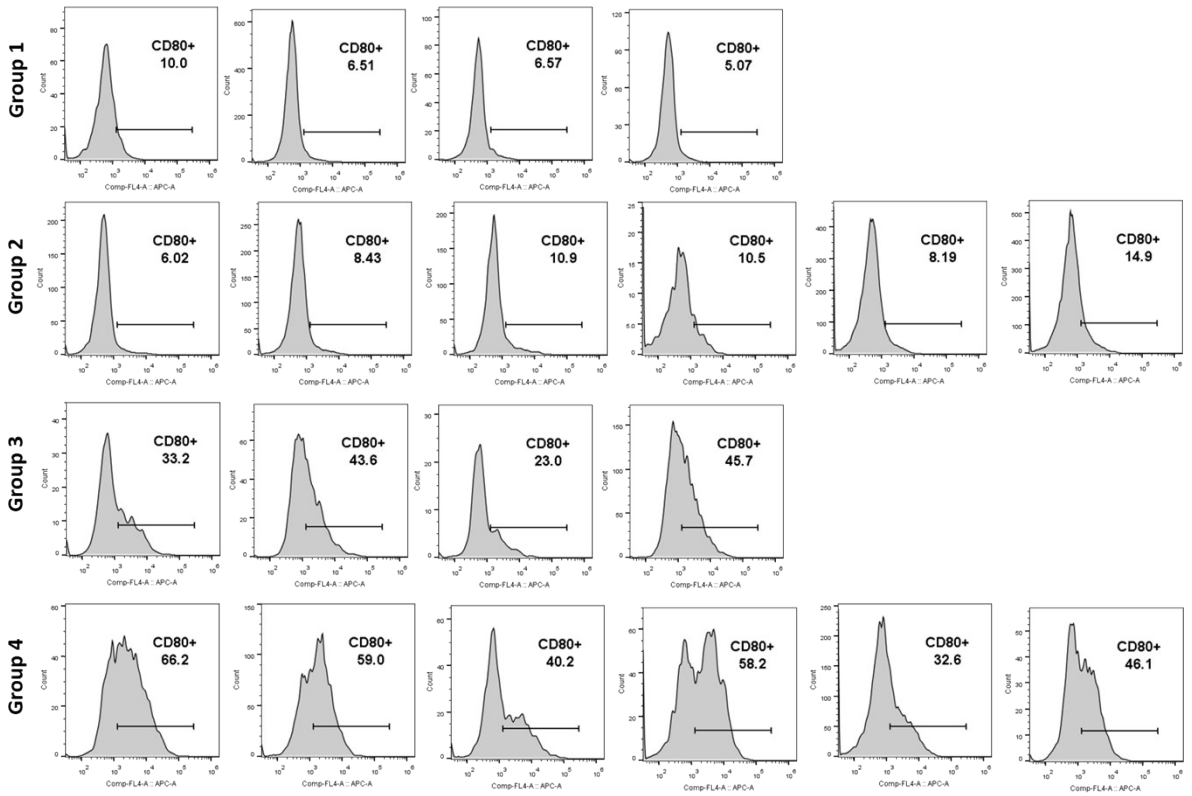

**Figure S11:** Representative flow cytometry plots of CD80<sup>+</sup> in Group1-FG, Group 2-Lap+PNSL-FG, Group 3-IMQ-MS-FG and Group 4-NMS

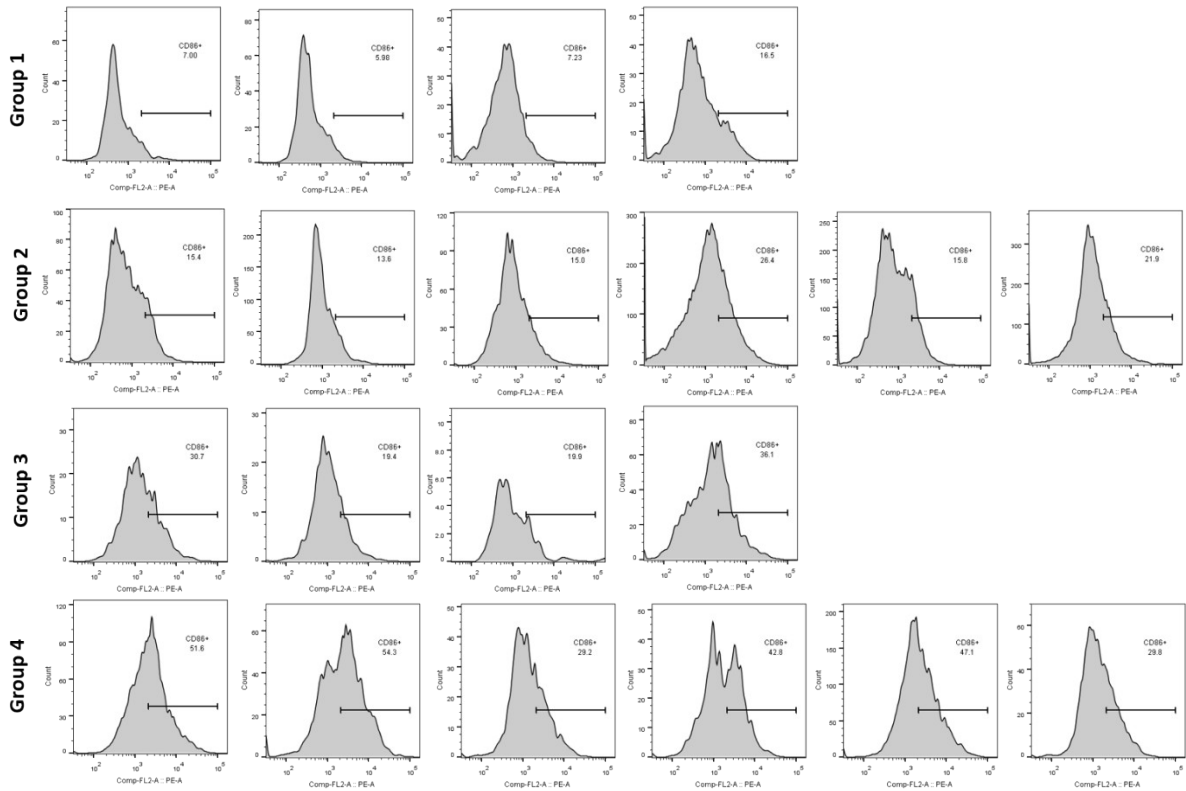

**Figure S12:** Representative flow cytometry plots of CD86<sup>+</sup> in Group1-FG, Group 2-Lap+PNSL-FG, Group 3-IMQ-MS-FG and Group 4-NMS.

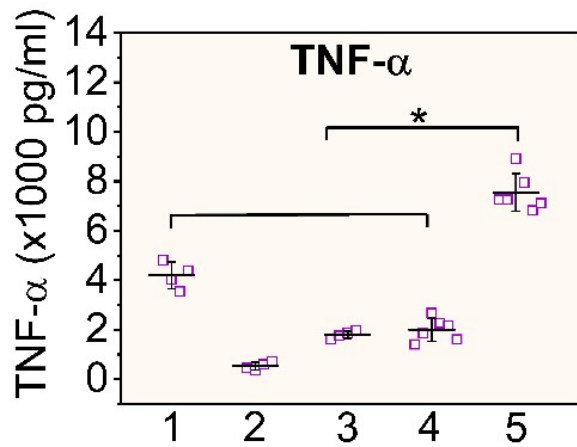

**Figure S13:** Serum TNF- $\alpha$  levels at day-3 post treatment (1-FG, 2-Lap+PNSL-FG, 3-IMQ-MS-FG, 4-NMS-FG, 5-Control) (n = 4 to 6), \* $p \leq 0.05$ .

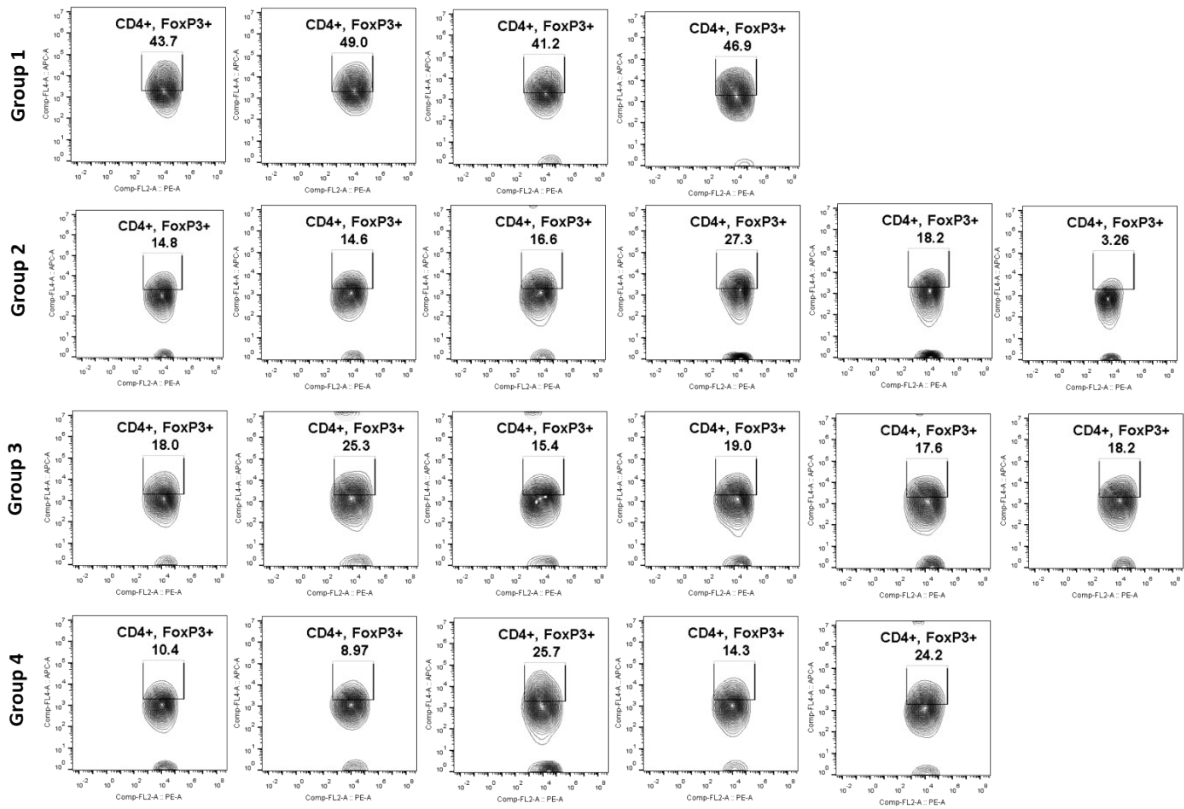

**Figure S14:** Representative flow cytometry plots of FoxP3+ in Group1-FG, Group 2-Lap+PNSL-FG, Group 3-IMQ-MS-FG and Group 4-NMS.

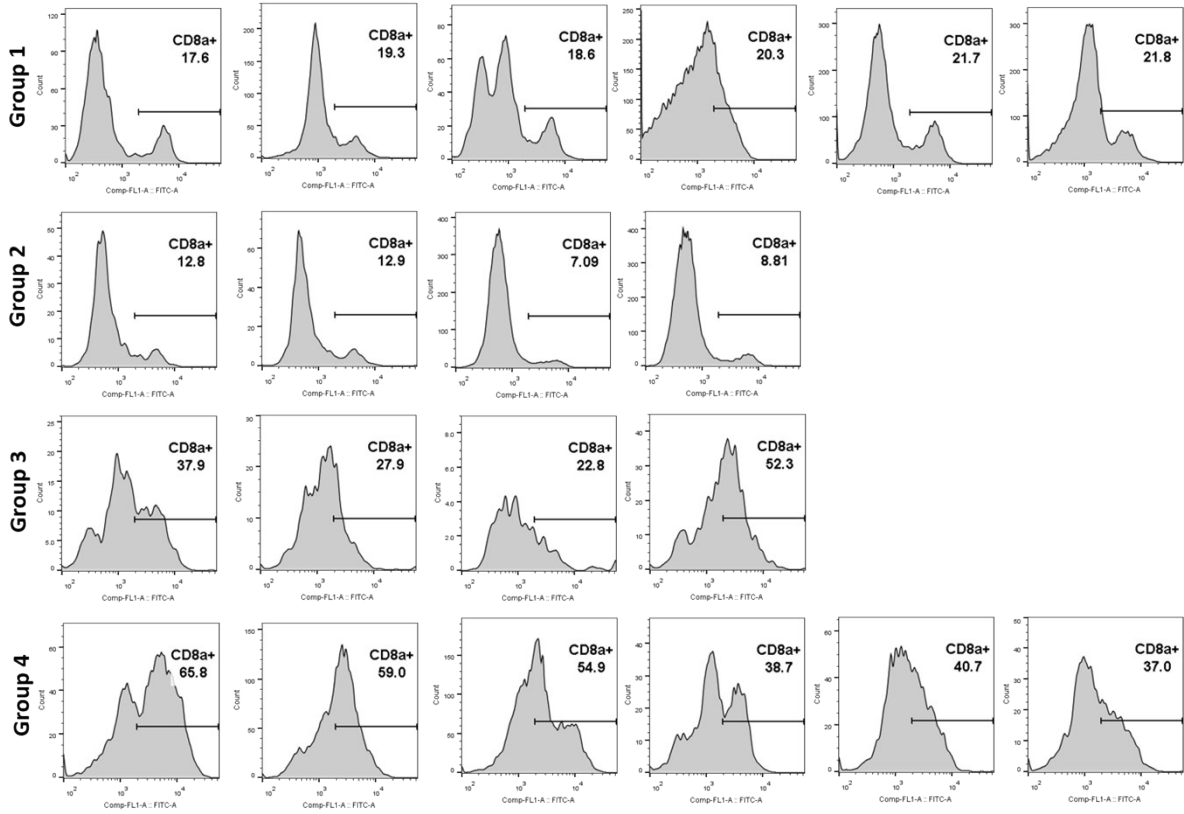

**Figure S15:** Representative flow cytometry plots of CD8a<sup>+</sup> in Group1-FG, Group 2-Lap+PNLS-FG, Group 3-IMQ-MS-FG and Group 4-NMS.

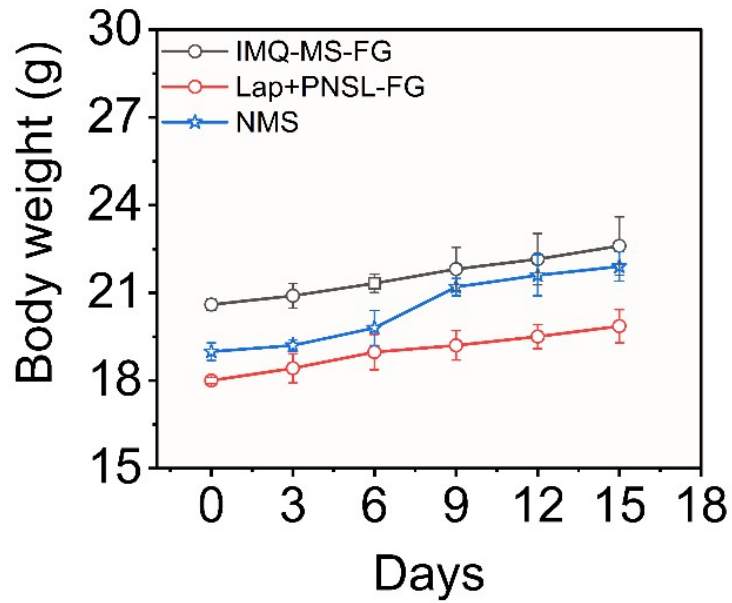

**Figure S16:** Body weight during the course of 15 days in IMQ-MS-FG, Lap+PNSL-FG and NMS.

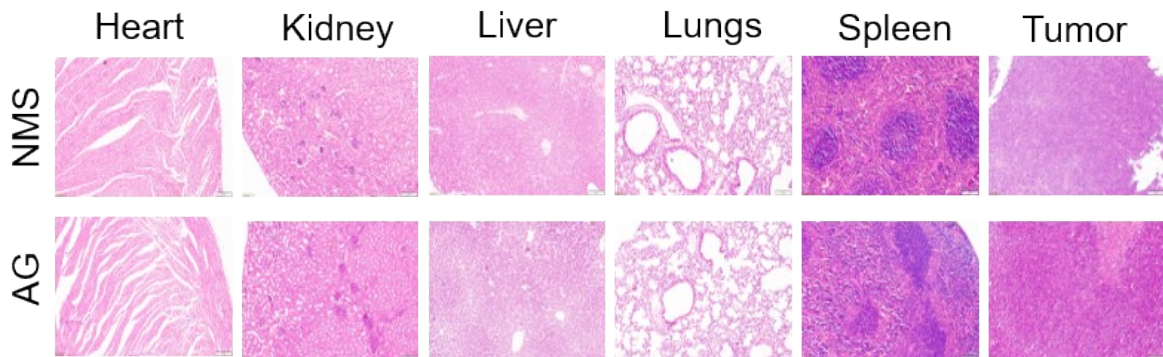

**Figure S17:** Histological analysis of NMS and AG at 50<sup>th</sup> day.(10x, scale bar 100  $\mu$ m)

**Supplementary Video - 1** shows Surgical Resection of 4T1 Tumor in BALB/c mice followed by Application of Autologous Hybrid Fibrin Implant and Closure of Surgical Site. (Vial-1: Tranexamic acid + PRP and Vial-2: PNS + 0.25M Ca<sup>2+</sup>)
